# Supplementary material for: A Developmental Transcriptome Map for Allotetraploid Arachis hypogaea
Source: Front Plant Sci. 2016 Sep 30;7:1446. doi: 10.3389/fpls.2016.01446 (PMC5043296; doi:10.3389/fpls.2016.01446)
Supplement: Supplementary file 7 [file Table7.XLSX]

## Sheet: Sheet1
Table S7. Positions of intronic non-coding RNAs (ncRNAs) based on diploid progenitor genome sequence. Positions of Arachis duranensis (Aradu) and Arachis ipaensis (Araip) ncRNAs. Positions are based on pseudomolecules v1.0 (peanutbase.org).
chromosome	start	end	id
Aradu.A01	5853278	5854268	Adur19703_comp0_c0_seq2
Aradu.A01	12027158	12027586	Adur26287_comp0_c0_seq1
Aradu.A01	39816917	39817311	Adur44217_comp2_c0_seq1
Aradu.A01	40605077	40605389	Adur44306_comp0_c0_seq1
Aradu.A01	43469897	43470256	Adur44669_comp0_c0_seq1
Aradu.A01	63636725	63637055	Adur50293_comp0_c0_seq1
Aradu.A02	1249498	1250363	Adur4581_comp1_c0_seq1
Aradu.A02	3504634	3505387	Adur11372_comp0_c0_seq1
Aradu.A02	7245727	7245930	Adur22170_comp1_c0_seq1
Aradu.A02	11211156	11211570	Adur26232_comp2_c0_seq1
Aradu.A02	14313051	14313662	Adur30162_comp1_c0_seq1
Aradu.A02	15038369	15038730	Adur34629_comp0_c0_seq1
Aradu.A02	28178657	28179033	Adur40820_comp2_c0_seq2
Aradu.A02	30926693	30927090	Adur41695_comp0_c0_seq1
Aradu.A02	136103768	136103984	Aipa48897_comp0_c0_seq1
Aradu.A03	12271	12501	Adur1999_comp0_c0_seq1
Aradu.A03	4174401	4174818	Adur16951_comp1_c0_seq1
Aradu.A03	4721680	4722080	Adur18703_comp0_c0_seq2
Aradu.A03	13008603	13009356	Adur26497_comp0_c0_seq1
Aradu.A03	14402607	14402935	Adur31056_comp0_c0_seq1
Aradu.A03	14539720	14540457	Adur34206_comp0_c0_seq1
Aradu.A03	14608548	14609169	Adur34244_comp0_c0_seq1
Aradu.A03	29361158	29362903	Adur41335_comp0_c0_seq1
Aradu.A03	36640177	36640490	Adur43870_comp0_c0_seq1
Aradu.A03	45589869	45590250	Adur45157_comp4_c0_seq1
Aradu.A03	78352925	78354193	Aipa3401_comp0_c0_seq2
Aradu.A03	91319920	91320712	Aipa6299_comp0_c0_seq1
Aradu.A03	92309998	92310654	Aipa6634_comp1_c0_seq1
Aradu.A04	4371090	4371448	Adur17971_comp5_c0_seq1
Aradu.A04	5853665	5854165	Adur20151_comp0_c0_seq2
Aradu.A04	5968090	5968459	Adur20234_comp3_c0_seq1
Aradu.A04	6281481	6282290	Adur20345_comp0_c0_seq1
Aradu.A04	7922093	7922296	Adur22876_comp0_c0_seq1
Aradu.A04	10179116	10181518	Adur25190_comp5_c0_seq1
Aradu.A04	15600134	15600770	Adur34727_comp1_c0_seq56
Aradu.A04	15861389	15861911	Adur35101_comp0_c0_seq1
Aradu.A04	17566882	17567128	Adur35434_comp0_c0_seq1
Aradu.A04	22803733	22804086	Adur36667_comp0_c0_seq1
Aradu.A04	36525367	36526021	Adur43066_comp6_c0_seq1
Aradu.A04	105662690	105663062	Aipa18734_comp0_c0_seq2
Aradu.A04	108615253	108615507	Aipa20678_comp0_c0_seq1
Aradu.A05	283617	284011	Adur3909_comp0_c0_seq1
Aradu.A05	915720	916040	Adur3977_comp1_c1_seq1
Aradu.A05	1366708	1366934	Adur5462_comp0_c0_seq1
Aradu.A05	1653832	1654454	Adur6491_comp1_c0_seq2
Aradu.A05	1775694	1775918	Adur6890_comp1_c0_seq1
Aradu.A05	2412376	2413068	Adur8112_comp1_c0_seq1
Aradu.A05	2478772	2479049	Adur8112_comp3_c0_seq1
Aradu.A05	3873047	3873671	Adur15853_comp3_c0_seq1
Aradu.A05	3897259	3897528	Adur16156_comp8_c0_seq1
Aradu.A05	4205861	4206335	Adur17827_comp2_c0_seq1
Aradu.A05	9247822	9248095	Adur23765_comp4_c0_seq1
Aradu.A05	14422543	14422914	Adur32141_comp0_c0_seq2
Aradu.A05	27264346	27265046	Adur40496_comp2_c0_seq1
Aradu.A05	27584027	27584277	Adur40616_comp1_c0_seq1
Aradu.A05	28931636	28932093	Adur41191_comp0_c0_seq1
Aradu.A05	30933096	30933575	Adur42308_comp0_c0_seq1
Aradu.A06	1616326	1616563	Adur5571_comp1_c0_seq1
Aradu.A06	6691359	6691801	Adur21975_comp0_c0_seq1
Aradu.A06	13740655	13740947	Adur29648_comp2_c0_seq1
Aradu.A06	48414365	48414728	Adur47503_comp0_c0_seq12
Aradu.A07	11368	11577	Adur1603_comp0_c0_seq1
Aradu.A07	9436545	9436788	Adur24346_comp2_c0_seq1
Aradu.A07	10736124	10736406	Adur25605_comp1_c0_seq1
Aradu.A07	24902660	24902886	Adur37932_comp0_c0_seq1
Aradu.A07	47463448	47463830	Adur46000_comp1_c0_seq1
Aradu.A08	7379	7697	Adur367_comp0_c0_seq1
Aradu.A08	2193250	2193710	Adur7758_comp0_c0_seq1
Aradu.A08	3519880	3520182	Adur12902_comp0_c0_seq3
Aradu.A08	4799275	4799642	Adur19177_comp0_c0_seq1
Aradu.A08	4924627	4924999	Adur19178_comp1_c0_seq1
Aradu.A08	9601668	9601937	Adur24945_comp0_c1_seq1
Aradu.A08	10078216	10078483	Adur24979_comp2_c0_seq1
Aradu.A08	27717655	27719226	Adur40802_comp1_c0_seq1
Aradu.A08	58498319	58498908	Adur49252_comp2_c0_seq1
Aradu.A08	58500269	58502474	Adur49320_comp1_c0_seq1
Aradu.A09	2918165	2918587	Adur9342_comp0_c0_seq2
Aradu.A09	3328047	3328615	Adur9476_comp0_c0_seq1
Aradu.A09	21170416	21170709	Adur35530_comp0_c1_seq1
Aradu.A09	23611479	23612099	Adur36728_comp3_c0_seq1
Aradu.A09	30832328	30832602	Adur41362_comp0_c1_seq1
Aradu.A09	37945831	37946120	Adur44012_comp3_c0_seq1
Aradu.A09	54475970	54476442	Adur49086_comp0_c0_seq1
Aradu.A09	58033957	58034421	Adur49087_comp0_c0_seq1
Aradu.A09	135565082	135565486	Aipa46640_comp0_c0_seq1
Aradu.A10	4010788	4011518	Adur16842_comp0_c0_seq1
Aradu.A10	4070436	4070757	Adur16848_comp3_c0_seq1
Aradu.A10	7873010	7873228	Adur22624_comp1_c0_seq2
Aradu.A10	8271880	8272392	Adur23049_comp1_c0_seq2
Aradu.A10	10215141	10215414	Adur25434_comp1_c0_seq1
Aradu.A10	13855467	13857696	Adur29831_comp1_c0_seq1
Aradu.A10	25861704	25862067	Adur38304_comp1_c0_seq1
Araip.B01	24328170	24329565	Adur37314_comp4_c0_seq1
Araip.B01	47657608	47658661	Adur46436_comp0_c0_seq1
Araip.B01	95458666	95458910	Aipa9461_comp1_c0_seq1
Araip.B01	121540537	121541278	Aipa30745_comp0_c0_seq1
Araip.B01	131743129	131743338	Aipa39796_comp0_c0_seq1
Araip.B01	134451412	134451825	Aipa44789_comp0_c0_seq1
Araip.B01	141097042	141097639	Aipa49772_comp0_c0_seq1
Araip.B01	142577161	142577412	Aipa51446_comp0_c0_seq1
Araip.B01	142941877	142943072	Aipa51630_comp0_c0_seq1
Araip.B02	1251224	1251580	Adur4695_comp0_c0_seq1
Araip.B02	78354375	78354650	Aipa3644_comp0_c0_seq1
Araip.B02	93996382	93996796	Aipa7957_comp0_c0_seq1
Araip.B02	97352044	97352296	Aipa11130_comp0_c0_seq1
Araip.B02	97352066	97352296	Aipa11452_comp0_c0_seq1
Araip.B02	101231240	101231473	Aipa11536_comp0_c0_seq1
Araip.B02	101835197	101835577	Aipa11622_comp0_c0_seq1
Araip.B02	108197548	108197803	Aipa19712_comp0_c0_seq1
Araip.B02	108298906	108299134	Aipa19745_comp2_c0_seq1
Araip.B02	112332819	112333705	Aipa22304_comp0_c0_seq1
Araip.B03	12957509	12958427	Adur26417_comp2_c0_seq1
Araip.B03	63719541	63720055	Aipa191_comp0_c0_seq1
Araip.B03	78352925	78353546	Aipa3449_comp0_c0_seq1
Araip.B03	92923326	92924114	Aipa6996_comp0_c0_seq1
Araip.B03	92984832	92985046	Aipa7042_comp0_c0_seq1
Araip.B03	119425643	119425906	Aipa27796_comp7_c0_seq1
Araip.B03	119426214	119426418	Aipa28222_comp6_c0_seq1
Araip.B03	119653317	119653680	Aipa28372_comp0_c0_seq1
Araip.B03	119819881	119820252	Aipa29894_comp0_c0_seq1
Araip.B03	124110304	124110621	Aipa34393_comp4_c1_seq5
Araip.B03	137017092	137017774	Aipa48960_comp1_c0_seq1
Araip.B04	4371204	4371513	Adur18090_comp1_c0_seq1
Araip.B04	101866203	101866628	Aipa12870_comp0_c0_seq1
Araip.B04	105861212	105861592	Aipa18734_comp1_c0_seq1
Araip.B04	106257611	106258264	Aipa18911_comp1_c0_seq1
Araip.B04	112333054	112333401	Aipa23104_comp0_c0_seq1
Araip.B04	114522326	114522718	Aipa24112_comp0_c0_seq1
Araip.B04	122787998	122788596	Aipa33588_comp0_c0_seq1
Araip.B04	123337119	123338017	Aipa33666_comp3_c0_seq1
Araip.B04	124736105	124736391	Aipa35552_comp1_c0_seq1
Araip.B04	143139603	143140262	Aipa51833_comp1_c0_seq1
Araip.B05	66882749	66883245	Aipa858_comp0_c0_seq1
Araip.B05	67093426	67093846	Aipa895_comp3_c0_seq1
Araip.B05	72869972	72870319	Aipa982_comp2_c0_seq1
Araip.B05	72869989	72870284	Aipa1052_comp2_c0_seq1
Araip.B05	92280700	92281067	Aipa6476_comp4_c0_seq1
Araip.B05	94962719	94963013	Aipa8603_comp1_c0_seq1
Araip.B05	95025595	95025869	Aipa9014_comp0_c0_seq1
Araip.B05	95505573	95505795	Aipa9461_comp2_c0_seq1
Araip.B05	104942217	104942632	Aipa16201_comp3_c0_seq1
Araip.B05	105624711	105624946	Aipa16524_comp0_c0_seq1
Araip.B05	130591754	130592026	Aipa39322_comp1_c0_seq1
Araip.B05	132850671	132851200	Aipa40494_comp0_c0_seq1
Araip.B05	133304602	133305078	Aipa43061_comp0_c0_seq1
Araip.B05	134787633	134787973	Aipa44810_comp3_c0_seq1
Araip.B06	93021292	93021782	Aipa7332_comp0_c0_seq1
Araip.B06	112335554	112335975	Aipa23469_comp1_c0_seq2
Araip.B06	115581799	115582011	Aipa24802_comp2_c0_seq1
Araip.B06	116123325	116123690	Aipa25563_comp0_c0_seq1
Araip.B06	124735212	124735694	Aipa34645_comp0_c0_seq1
Araip.B06	126173252	126173606	Aipa38309_comp3_c0_seq1
Araip.B06	126652814	126653218	Aipa38385_comp1_c0_seq1
Araip.B06	127737050	127737349	Aipa38479_comp2_c0_seq1
Araip.B06	127988136	127989345	Aipa38576_comp0_c0_seq1
Araip.B06	141482308	141482873	Aipa50280_comp0_c0_seq1
Araip.B07	103515079	103515425	Aipa15190_comp0_c0_seq1
Araip.B07	104312038	104312426	Aipa15270_comp4_c0_seq1
Araip.B07	112331731	112331973	Aipa22197_comp1_c0_seq1
Araip.B07	124835293	124836057	Aipa37409_comp0_c0_seq1
Araip.B07	135318508	135318745	Aipa44943_comp1_c0_seq1
Araip.B08	27097590	27098494	Adur38941_comp0_c0_seq1
Araip.B08	124814351	124815030	Aipa36497_comp0_c0_seq2
Araip.B08	133690159	133690552	Aipa43451_comp5_c0_seq1
Araip.B09	29914315	29915046	Adur41362_comp0_c0_seq1
Araip.B09	73754844	73755155	Aipa1676_comp0_c0_seq2
Araip.B09	105662448	105662690	Aipa18219_comp6_c0_seq1
Araip.B09	109102642	109103148	Aipa20689_comp1_c0_seq2
Araip.B09	110058461	110058686	Aipa20689_comp2_c0_seq1
Araip.B09	132153636	132153849	Aipa40422_comp1_c1_seq1
Araip.B09	133074393	133074625	Aipa42652_comp1_c0_seq1
Araip.B09	146795768	146796195	Aipa52221_comp0_c0_seq3
Araip.B10	3610583	3610963	Adur13525_comp0_c0_seq1
Araip.B10	49760296	49760628	Adur48858_comp1_c0_seq1
Araip.B10	78641921	78642165	Aipa4525_comp0_c0_seq1
Araip.B10	78814426	78814767	Aipa4804_comp0_c0_seq1
Araip.B10	87335052	87335717	Aipa4804_comp2_c0_seq1
Araip.B10	88935225	88935696	Aipa4806_comp1_c0_seq1
Araip.B10	89000454	89000691	Aipa4806_comp2_c0_seq1
Araip.B10	89001514	89001767	Aipa4950_comp5_c0_seq1
Araip.B10	112147029	112147297	Aipa22054_comp0_c0_seq1
Araip.B10	112336379	112336808	Aipa23583_comp0_c0_seq1
Araip.B10	116203885	116204273	Aipa26266_comp0_c1_seq1
Araip.B10	116915173	116915762	Aipa26303_comp0_c0_seq1
Araip.B10	118071982	118072659	Aipa26542_comp0_c0_seq1
Araip.B10	119045579	119045785	Aipa26825_comp4_c0_seq9
Adur1124	124926304	124926636	Aipa37915_comp0_c0_seq1
Adur1928	39310396	39310695	Adur44138_comp0_c0_seq1
Aipa1278	94311609	94311879	Aipa8321_comp1_c0_seq1
